# Supplementary material for: Progression of cyclosporine A-blood levels in experimental cats receiving a high-dose treatment protocol
Source: PubMed Central journal article supplement (PMC11521867; doi:10.3389/fvets.2024.1444586), 2024-10-16
Supplement: Data_Sheet_1.pdf [file Data_Sheet_1.pdf]

**PROGRESSION OF CYCLOSPORINE A-BLOOD LEVELS IN EXPERIMENTAL CATS RECEIVING A HIGH DOSED  
TREATMENT PROTOCOL**

FRONTIERS IN VETERINARY SCIENCE, VETERINARY PHARMACOLOGY AND TOXICOLOGY

**Supplementary Files**

**Supplementary Table**

**Cyclosporine A (CsA) trough levels (ng/ml) on days 1, 2, 3, 5, 7, and 10 of treatment (i.e., after 1, 3, 5, 9, 13, and 19 CsA administrations) in EDTA blood of six healthy Domestic Shorthair cats receiving oral treatment with 7 mg/kg CsA q 12 h.** Samples were taken 12 h after the first daily CsA dose before the next administration of the drug (trough levels). Due to normal distribution data are shown as mean  $\pm$  SD. SD = Standard deviation.

|               | <b>Cat 1</b> | <b>Cat 2</b> | <b>Cat 3</b> | <b>Cat 4</b> | <b>Cat 5</b> | <b>Cat 6</b> | <b>Mean <math>\pm</math> SD</b> |
|---------------|--------------|--------------|--------------|--------------|--------------|--------------|---------------------------------|
|               | <b>ng/mL</b> | <b>ng/mL</b> | <b>ng/mL</b> | <b>ng/mL</b> | <b>ng/mL</b> | <b>ng/mL</b> | <b>ng/mL</b>                    |
| <b>Day 1</b>  | 168          | 483          | 490          | 271          | 930          | 558          | 483 $\pm$ 264                   |
| <b>Day 2</b>  | 415          | 1287         | 1862         | 508          | 1565         | 1043         | 1113 $\pm$ 575                  |
| <b>Day 3</b>  | 819          | 2020         | 2147         | 456          | 2236         | 1222         | 1483 $\pm$ 756                  |
| <b>Day 5</b>  | 1169         | 3203         | 2918         | 832          | 2477         | 1699         | 2050 $\pm$ 964                  |
| <b>Day 7</b>  | 1263         | 3416         | 3529         | 1173         | 2891         | 1530         | 2300 $\pm$ 1099                 |
| <b>Day 10</b> | 1302         | 3253         | 3248         | 1412         | 2787         | 1891         | 2316 $\pm$ 893                  |

**Supplementary Video: Administration of CsA-capsule in one cat**

The cats tolerated the administration of CsA in capsules well. After dipping the capsules into a creamy treat, they ingested them on their own without any need for fixation. None of the cats of the present study showed vomiting or salivation after eating the capsule. As audible in the video, classical music was played throughout all treatments.
